# Supplementary material for: Revealing tunnelling details by normalized differential conductance analysis of transport across molecular junctions
Source: Royal Society of Chemistry journal article supplement (doi:10.1039/c7cp05536f), 2017-01-01
Supplement: c7cp05536f1.pdf [file c7cp05536f1.pdf]

Electronic supplementary information to:

## Revealing tunnelling details by normalized differential conductance analysis of transport across molecular junctions

### 1. Derivation of Eqs. 7,8

Here is a short derivation of the relation between the  $V_{t,q}$  values at an arbitrary  $NDC=q$  and  $V_0$  and  $S$  parameters:

Inserting Eqs. 1 and 2 into Eq. 4 of main text yields:

$$NDC = G \frac{V}{I} = \frac{1 + 2S\left(\frac{V}{V_0}\right) + 3\left(\frac{V}{V_0}\right)^2}{1 + S\left(\frac{V}{V_0}\right) + \left(\frac{V}{V_0}\right)^2} \quad (S.1)$$

Rearranging S.1 and setting  $NDC = q$  and  $V = V_q$ , yields:

$$\left(\frac{V_q}{V_0}\right)^2 + \left(\frac{V_q}{V_0}\right) \cdot S \frac{2-q}{3-q} - \frac{q-1}{3-q} = 0 \quad (S.2)$$

Eq. S.2 is a quadratic equation, with:

$$x^2 + x \cdot SA - B = 0 \quad (S.3)$$

$$x = V_q/V_0; \quad (S.3a)$$

$$A = (2-q)/(3-q); \quad (S.3b)$$

$$B = (q-1)/(3-q); \quad (S.3c)$$

Notice that both A and B are positive for  $1 < q < 2$ , which is the normal definition range of  $q$ .

Solving Eq. S.3 for  $x$ , and setting  $V_q = V_0 \cdot x$ , yields:

$$V_{q\pm} = V_0 \cdot \frac{-SA \pm \sqrt{S^2A^2 + 4B}}{2} \quad (S.4)$$

To extract  $V_0$  the  $SA$  term should be eliminated; this can be done using  $(-a+b)(-a-b) = -(b^2-a^2)$ :

$$-V_{q-} \cdot V_{q+} = \frac{V_0^2}{4} \cdot [S^2A^2 + 4B - S^2A^2] = V_0^2 \cdot B \quad (S.5)$$

And therefore:

$$V_0^2 = \frac{-V_{q-} \cdot V_{q+}}{B} \xrightarrow{S.3c} V_0 = \sqrt{-V_{q-} \cdot V_{q+} \frac{3-q}{q-1}} \quad (S.6)$$

The simplest way to extract  $S$ , is by relying on the above-extracted  $V_0$  and using the sum of  $V_{q\pm}$  values to eliminate the square-root term:

$$V_{q+} + V_{q-} = -V_0 S A \rightarrow S = -\frac{V_{q+} + V_{q-}}{V_0 A} \xrightarrow{S.3b} S = -\frac{V_{q+} + V_{q-}}{V_0} \cdot \frac{3-q}{2-q} \quad (S.7)$$

## 2. Statistic over full data sets

The next two figures show that the reproducibility in NDC-V traces is as good as or even better than the reproducibility of the raw data (see heat maps). The smooth Ag gave narrower distribution of NDC (Fig. S1c) and  $V_0$  (Fig. S1d) than the rough Ag (Figs. S2c,d); the poorer reproducibility of the latter is in line with the explanation of ill-controlled defects.

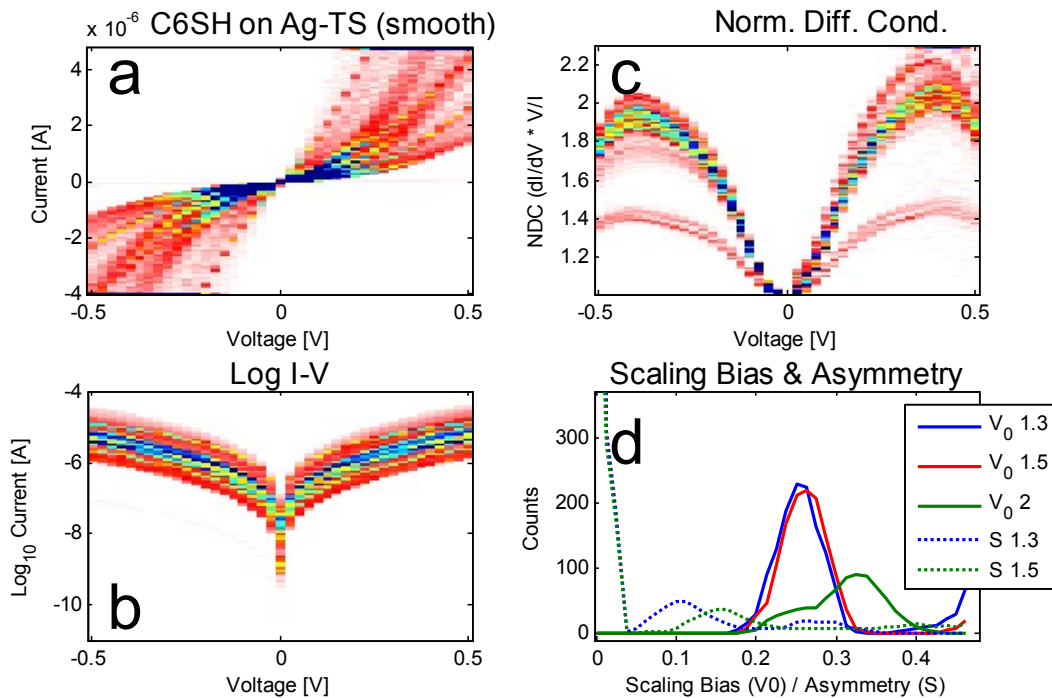

**Figure S1:** Statistical summary for smooth Ag<sup>TS</sup>-SC/EGaIn, showing a) heat-maps for linear I-V traces; b) heat-maps for log<sub>10</sub>(I)-V; c) heat-maps for NDC-V plots; d) histograms of the extracted  $V_0$  and  $S$  values (solid and dotted lines respectively), extracted using three values of  $q = 1.3, 1.5$

or 2. There is no  $S$  value for  $q=2$  because  $S$  is ill-defined within the parabolic approximation at  $q=2$ .

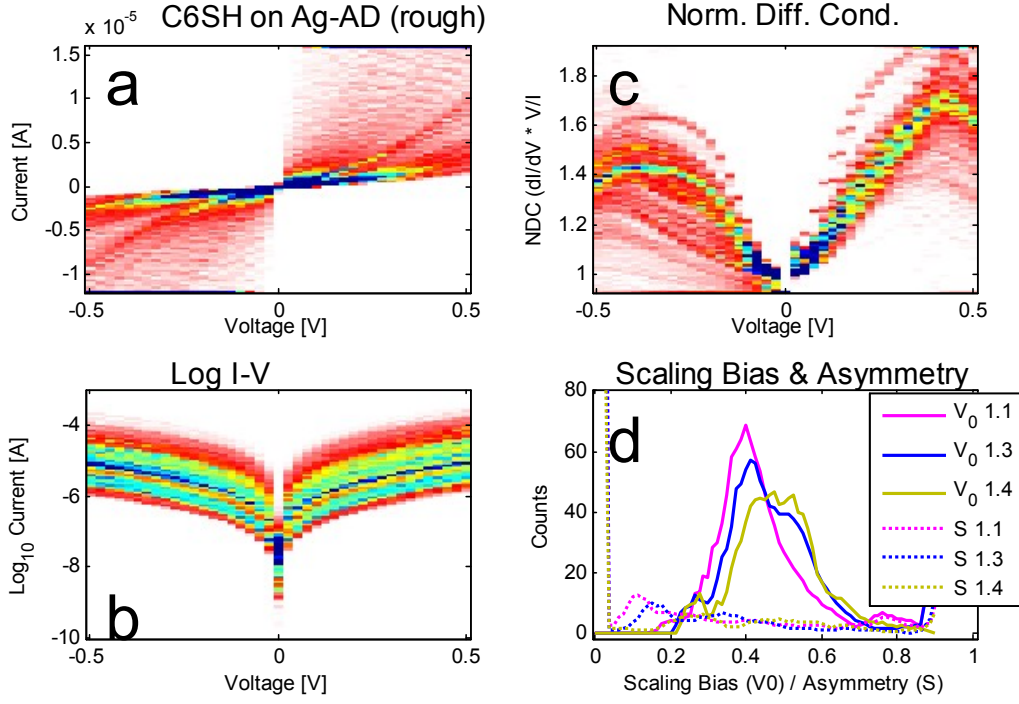

**Figure S2:** Statistical summary for rough  $\text{Ag}^{\text{AD}}\text{-SC/EGaIn}$ , showing a) heat-maps for linear I-V traces; b) heat-maps for  $\log_{10}(\text{I})\text{-V}$ ; c) heat-maps for NDC-V plots; d) histograms of the extracted  $V_0$  and  $S$  values (solid and dotted lines respectively), extracted using three values of  $q = 1.1, 1.3$ , or  $1.4$ . The chosen  $q$  values are lower than in Fig. S1, because NDC of  $\text{Ag}^{\text{AD}}$  reaches lower values.

### 3. Derivation the effective $G_{eq}$ and $V_0$ in the presence of shunt conductance (Eq. 9)

Substituting the parabolic approximation (Eq. 2) into the tunnelling term ( $I_{\text{Tnl}}$ ) of Eq. 9 yields:

$$I_{\text{Total}} = G_{eq} V \left[ 1 + \left( \frac{V}{V_0} \right)^2 \right] + G_{\text{shunt}} \cdot V \quad (\text{S.8})$$

where the  $S$  term is ignored for shortness. Collecting terms:

$$I_{\text{Total}} = (G_{eq} + G_{\text{shunt}}) V + G_{eq} \frac{V^3}{V_0^2} \quad (\text{S.9})$$

The coefficient multiplying  $V$  is the effective equilibrium conductance:

$$G_{eq,eff} = G_{eq} + G_{Shunt} \quad (S.10)$$

Eq. S.9 can be re-written in the form of Eq. 2 by dividing and multiplying the  $V^3$  term by  $G_{eq,eff}$ :

$$I_{Total} = G_{eq,eff}V + G_{eq,eff}V \cdot \frac{G_{eq} V^2}{G_{eq,eff}V_0^2} \quad (S.11a)$$

Or:

$$I_{Total} = G_{eq,eff}V \left[ 1 + \left( \frac{V}{V_{0,eff}} \right)^2 \right] \quad (S.11b)$$

It implies that the apparent  $V_{0,eff}$  contains an artificial factor:

$$\frac{1}{V_{0,eff}^2} = \frac{G_{eq}}{G_{eq,eff}V_0^2} \quad (S.12)$$

$$\left( \frac{V_{0,eff}}{V_0} \right)^2 = \frac{G_{eq,eff}}{G_{eq}} \quad (S.13)$$
